# Supplementary material for: Structural investigation of a hydrogen bond order–disorder transition in a polar one-dimensional confined ice
Source: Royal Society of Chemistry journal article supplement (doi:10.1039/c3cp53994f), 2013-12-16
Supplement: c3cp53994f.pdf [file c3cp53994f.pdf]

# Structural Investigation of a Hydrogen Bond Order-Disorder Transition in a Polar One-Dimensional Confined Ice

## SUPPLEMENTARY INFORMATION

Jasper Adamson, Nicholas P. Funnell, Amber L. Thompson, and Andrew L. Goodwin\*

Department of Chemistry, University of Oxford, Inorganic Chemistry Laboratory,  
South Parks Road, Oxford OX1 3QR, U.K.

\*To whom correspondence should be addressed; E-mail: [andrew.goodwin@chem.ox.ac.uk](mailto:andrew.goodwin@chem.ox.ac.uk).

**Submitted to Physical Chemistry Chemical Physics**

## Contents

|          |                                                                                  |           |
|----------|----------------------------------------------------------------------------------|-----------|
| <b>1</b> | <b>Synthesis of HHTP·4H<sub>2</sub>O</b>                                         | <b>3</b>  |
| <b>2</b> | <b>Variable-temperature single crystal X-ray diffraction</b>                     | <b>4</b>  |
| 2.1      | Method . . . . .                                                                 | 4         |
| 2.2      | Treatment of water molecules . . . . .                                           | 13        |
| <b>3</b> | <b>The order parameter</b>                                                       | <b>15</b> |
| 3.1      | Relationship to diffraction intensities . . . . .                                | 15        |
| 3.2      | Experimental determination of the order parameter variation with temperature . . | 15        |
| <b>4</b> | <b>References</b>                                                                | <b>20</b> |

## 1 Synthesis of HHTP·4H<sub>2</sub>O

Powdered HHTP·H<sub>2</sub>O was obtained from Tokyo Chemical Industry UK. Successive recrystallisations from acetone and a 1:1 volume mixture of water and acetone, yielded dark red needle-like crystals from slow evaporation. The crystal habit is illustrated in Fig. S1.

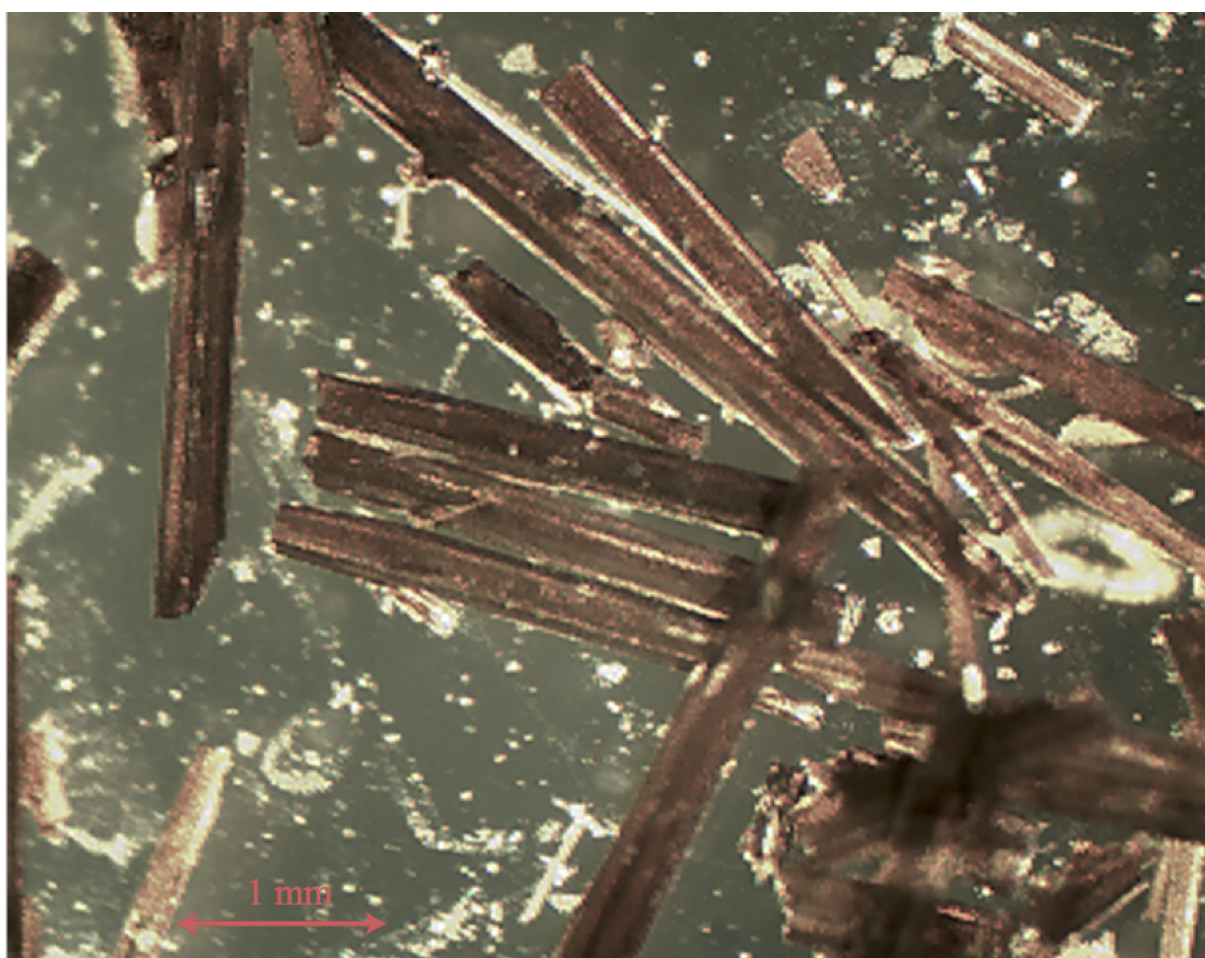

**Figure S1:** Optical microscopy image of representative crystals of HHTP·4H<sub>2</sub>O, prepared as described in the main text. The crystal habit is rectangular prismatic, with the long axis parallel to the *c* crystal axis (*i.e.*, the confinement axis).

## 2 Variable-temperature single crystal X-ray diffraction

### 2.1 Method

X-ray diffraction data were collected on a single crystal of HHTP·4H<sub>2</sub>O using an Oxford Diffraction (Agilent Technologies) SuperNova (Mo K $\alpha$  radiation) equipped with an Oxford Cryosystems cryostream.<sup>S1</sup> The sample was coated in perfluoropolyether oil and placed in the cold N<sub>2</sub> open flow of an Oxford CryoSystems Cryostream<sup>S1</sup> at 100 K, after data were collected on heating the sample to 240 K in 10 K intervals. The crystal was then heated to 260 K to ensure the sample had undergone complete transformation, before it was cooled to 240 K. Subsequent data collections between 240 and 130 K were also carried out. Data were integrated and corrected for absorption using CrysAlisPro. The structure was solved using the data collected at 100 K, using SIR92<sup>S2</sup> and refined against  $F^2$  using full-matrix least squares, as implemented in CRYSTALS.<sup>S3</sup> All non-hydrogen atoms in the 100 K structure were refined with anisotropic displacement parameters. Hydrogen atoms were visible in the difference map and positioned as given in Section 2.2. At 240 K, only the non-hydrogen atoms bound to the HHTP moiety were refined with anisotropic displacement parameters; water oxygens were split over two sites and refined with isotropic displacement parameters, with partial occupancies of 50%. Hydrogen atoms in both structures were located using a difference Fourier map — detailed information on the treatment of hydrogen atoms is given further below. Select crystal structure refinement details are given in Tables S1 and S2. Variable-temperature lattice parameters are given in Tables S3 and S4; the corresponding trends are illustrated in Fig. S2.

The conventions for placing the unit cell origin differ between the space groups  $Pbcn$  and  $P2_1cn$ . In order to facilitate direct comparison of the atomic coordinates, we have implemented an origin shift for the  $P2_1cn$  structure solution (100 K). This choice of nonstandard origin generates a number of alerts in checkCIF; these can safely be ignored.

**Table S1:** Single-crystal X-ray diffraction data collection and refinement details for HHTP·4H<sub>2</sub>O at  $T = 100$  K on heating.

|                                        |                                                 |             |             |                           |
|----------------------------------------|-------------------------------------------------|-------------|-------------|---------------------------|
| Radiation                              | Mo $K\alpha$ , $\lambda = 0.71073$ Å            |             |             |                           |
| Formula                                | C <sub>18</sub> H <sub>20</sub> O <sub>10</sub> |             |             |                           |
| $M$ , g mol <sup>-1</sup>              | 396.35                                          |             |             |                           |
| $Z$                                    | 4                                               |             |             |                           |
| Crystal Size (mm)                      | 0.03 × 0.10 × 0.19                              |             |             |                           |
| Crystal System                         | Orthorhombic                                    |             |             |                           |
| Space Group                            | $P2_1cn$                                        |             |             |                           |
| $a$ (Å)                                | 14.20002(19)                                    |             |             |                           |
| $b$ (Å)                                | 16.7353(2)                                      |             |             |                           |
| $c$ (Å)                                | 7.17809(9)                                      |             |             |                           |
| $V$ (Å <sup>3</sup> )                  | 1705.82(4)                                      |             |             |                           |
| No. of Reflections( $I/\sigma > 2.0$ ) | 3455                                            |             |             |                           |
| Goodness of Fit                        | 1.0051                                          |             |             |                           |
| $R(I/\sigma > 2.0)$                    | 0.0308                                          |             |             |                           |
| Atom                                   | $x$                                             | $y$         | $z$         | $U_{eq}$ , Å <sup>2</sup> |
| C1                                     | 0.45532(13)                                     | 0.26668(9)  | 0.7171(2)   | 0.0156                    |
| C2                                     | 0.41227(14)                                     | 0.33799(9)  | 0.67410(18) | 0.0152                    |
| C3                                     | 0.45536(13)                                     | 0.41202(8)  | 0.7117(2)   | 0.0127                    |
| C4                                     | 0.40722(13)                                     | 0.48741(9)  | 0.66958(18) | 0.0137                    |
| C5                                     | 0.31699(12)                                     | 0.48968(9)  | 0.58813(19) | 0.0136                    |
| C6                                     | 0.27207(12)                                     | 0.56128(11) | 0.5536(2)   | 0.0157                    |
| C7                                     | 0.31614(12)                                     | 0.63329(9)  | 0.6011(2)   | 0.0150                    |
| C8                                     | 0.40401(13)                                     | 0.63238(10) | 0.68049(19) | 0.0157                    |
| C9                                     | 0.45232(12)                                     | 0.55999(9)  | 0.7129(2)   | 0.0130                    |
| C10                                    | 0.54698(12)                                     | 0.56069(9)  | 0.7904(2)   | 0.0140                    |
| C11                                    | 0.59399(14)                                     | 0.63291(9)  | 0.82159(19) | 0.0152                    |

Continued on next page

**Table S1 – continued from previous page**

| Atom | <i>x</i>     | <i>y</i>    | <i>z</i>    | <i>U</i> <sub>eq</sub> , Å <sup>2</sup> |
|------|--------------|-------------|-------------|-----------------------------------------|
| C12  | 0.68197(13)  | 0.63534(9)  | 0.8980(2)   | 0.0155                                  |
| C13  | 0.72726(12)  | 0.56368(10) | 0.9493(2)   | 0.0146                                  |
| C14  | 0.68288(13)  | 0.49212(9)  | 0.9154(2)   | 0.0148                                  |
| C15  | 0.59224(14)  | 0.48820(8)  | 0.83422(19) | 0.0126                                  |
| C16  | 0.54572(13)  | 0.41266(9)  | 0.7943(2)   | 0.0133                                  |
| C17  | 0.58911(14)  | 0.33872(8)  | 0.83568(19) | 0.0145                                  |
| C18  | 0.54533(13)  | 0.26732(9)  | 0.7981(2)   | 0.0155                                  |
| O1   | 0.41568(10)  | 0.19318(7)  | 0.68496(18) | 0.0229                                  |
| O6   | 0.18498(10)  | 0.56655(6)  | 0.47125(17) | 0.0192                                  |
| O7   | 0.26846(10)  | 0.70355(7)  | 0.56481(17) | 0.0199                                  |
| O12  | 0.72914(10)  | 0.70638(7)  | 0.93153(17) | 0.0195                                  |
| O13  | 0.81367(10)  | 0.57082(6)  | 1.03129(17) | 0.0200                                  |
| O18  | 0.58427(11)  | 0.19421(6)  | 0.83644(16) | 0.0209                                  |
| O100 | −0.07227(11) | 0.55742(9)  | 0.5735(2)   | 0.0304                                  |
| O200 | −0.11545(12) | 0.67420(8)  | 1.30833(18) | 0.0319                                  |
| O300 | 0.10297(12)  | 0.66840(8)  | 1.21325(17) | 0.0306                                  |
| O400 | 0.08209(12)  | 0.56316(8)  | 0.9234(2)   | 0.0311                                  |
| H11  | 0.3602       | 0.1971      | 0.6563      | 0.0352                                  |
| H21  | 0.3526       | 0.3370      | 0.6185      | 0.0177                                  |
| H51  | 0.2863       | 0.4426      | 0.5547      | 0.0156                                  |
| H61  | 0.1600       | 0.5234      | 0.4498      | 0.0311                                  |
| H71  | 0.3052       | 0.7414      | 0.5855      | 0.0314                                  |
| H81  | 0.4311       | 0.6819      | 0.7111      | 0.0182                                  |
| H111 | 0.5658       | 0.6826      | 0.7869      | 0.0171                                  |
| H121 | 0.7011       | 0.7425      | 0.8696      | 0.0303                                  |
| H131 | 0.8359       | 0.5278      | 1.0619      | 0.0306                                  |
| H141 | 0.7134       | 0.4444      | 0.9501      | 0.0178                                  |
| H171 | 0.6509       | 0.3383      | 0.8921      | 0.0170                                  |

Continued on next page

**Table S1 – continued from previous page**

| Atom  | <i>x</i> | <i>y</i> | <i>z</i> | $U_{\text{eq}}, \text{\AA}^2$ |
|-------|----------|----------|----------|-------------------------------|
| H181  | 0.6372   | 0.1984   | 0.8850   | 0.0325                        |
| H1001 | −0.0523  | 0.5894   | 0.6524   | 0.0484                        |
| H1002 | −0.0205  | 0.5357   | 0.5320   | 0.0472                        |
| H2001 | −0.1494  | 0.6542   | 1.2217   | 0.0504                        |
| H2002 | −0.1002  | 0.6417   | 1.3946   | 0.0502                        |
| H3001 | 0.1314   | 0.6452   | 1.3042   | 0.0464                        |
| H3002 | 0.0475   | 0.6725   | 1.2555   | 0.0471                        |
| H4001 | 0.0922   | 0.5916   | 0.8282   | 0.0480                        |
| H4002 | 0.0803   | 0.5887   | 1.0241   | 0.0479                        |

Estimated standard deviations are given in parentheses.

**Table S2:** Single-crystal X-ray diffraction data collection and refinement details for HHTP·4H<sub>2</sub>O at  $T = 240$  K on heating.

|                                        |             |            |             |                                  |
|----------------------------------------|-------------|------------|-------------|----------------------------------|
| Space Group                            | <i>Pbcn</i> |            |             |                                  |
| <i>a</i> (Å)                           | 14.2568(2)  |            |             |                                  |
| <i>b</i> (Å)                           | 16.7791(2)  |            |             |                                  |
| <i>c</i> (Å)                           | 7.2308(1)   |            |             |                                  |
| <i>V</i> (Å <sup>3</sup> )             | 1729.73(4)  |            |             |                                  |
| No. of Reflections( $I/\sigma > 2.0$ ) | 1609        |            |             |                                  |
| Goodness of Fit                        | 0.9963      |            |             |                                  |
| $R(I/\sigma > 2.0)$                    | 0.0487      |            |             |                                  |
| Atom                                   | <i>x</i>    | <i>y</i>   | <i>z</i>    | $U_{\text{eq}}$ , Å <sup>2</sup> |
| C1                                     | 0.45531(11) | 0.26762(9) | 0.7101(2)   | 0.0287                           |
| C2                                     | 0.41209(11) | 0.33865(9) | 0.6705(2)   | 0.0267                           |
| C3                                     | 0.45487(10) | 0.41240(8) | 0.7092(2)   | 0.0226                           |
| C4                                     | 0.40783(10) | 0.48771(9) | 0.66921(19) | 0.0225                           |
| C5                                     | 0.31771(10) | 0.49067(9) | 0.5894(2)   | 0.0257                           |
| C6                                     | 0.27303(11) | 0.56190(9) | 0.5557(2)   | 0.0275                           |
| C7                                     | 0.31717(11) | 0.63343(9) | 0.6044(2)   | 0.0283                           |
| C8                                     | 0.40490(11) | 0.63196(9) | 0.6803(2)   | 0.0278                           |
| C9                                     | 0.45277(10) | 0.56006(9) | 0.7117(2)   | 0.0235                           |
| O1                                     | 0.41629(9)  | 0.19451(7) | 0.6751(2)   | 0.0437                           |
| O6                                     | 0.18630(9)  | 0.56766(7) | 0.4754(2)   | 0.0384                           |
| O7                                     | 0.26947(8)  | 0.70354(7) | 0.5698(2)   | 0.0384                           |
| O100                                   | −0.0671(3)  | 0.5590(3)  | 0.5476(6)   | 0.0558(12)                       |
| O200                                   | −0.1287(3)  | 0.6728(2)  | 1.3105(5)   | 0.0534(10)                       |
| O300                                   | −0.0997(3)  | 0.6703(2)  | 1.2830(5)   | 0.0458(8)                        |
| O400                                   | −0.0838(3)  | 0.5616(2)  | 0.5923(6)   | 0.0466(10)                       |
| H21                                    | 0.3534      | 0.3384     | 0.6154      | 0.0287                           |

Continued on next page



**Table S2 – continued from previous page**

| Atom  | <i>x</i> | <i>y</i> | <i>z</i> | $U_{\text{eq}}, \text{\AA}^2$ |
|-------|----------|----------|----------|-------------------------------|
| H51   | 0.2892   | 0.4447   | 0.5538   | 0.0288                        |
| H81   | 0.4330   | 0.6795   | 0.7127   | 0.0312                        |
| H11   | 0.3654   | 0.1974   | 0.6341   | 0.0633                        |
| H61   | 0.1668   | 0.5263   | 0.4328   | 0.0532                        |
| H71   | 0.2989   | 0.7372   | 0.6232   | 0.0564                        |
| H1001 | -0.0642  | 0.5858   | 0.6435   | 0.0763                        |
| H1002 | -0.0162  | 0.5381   | 0.5158   | 0.0758                        |
| H2001 | -0.1489  | 0.6481   | 1.2185   | 0.0721                        |
| H2002 | -0.0994  | 0.6467   | 1.3865   | 0.0713                        |
| H3001 | -0.1446  | 0.6692   | 1.2044   | 0.0649                        |
| H3002 | -0.0478  | 0.6651   | 1.2312   | 0.0651                        |
| H4001 | -0.1234  | 0.5859   | 0.6559   | 0.0644                        |
| H4002 | -0.0709  | 0.5844   | 0.4924   | 0.0638                        |

Estimated standard deviations are given in parentheses.

**Table S3:** Temperature dependence of unit cell parameters (heating).

| Temperature (K) | a (Å)        | b(Å)         | c(Å)       | V(Å <sup>3</sup> ) |
|-----------------|--------------|--------------|------------|--------------------|
| 100             | 14.20002(19) | 16.7353(2)   | 7.17809(9) | 1705.82(4)         |
| 110             | 14.20532(15) | 16.73488(19) | 7.18143(7) | 1707.20(3)         |
| 120             | 14.21093(16) | 16.7346(2)   | 7.18522(8) | 1708.75(3)         |
| 130             | 14.21481(15) | 16.73492(19) | 7.18961(8) | 1710.29(3)         |
| 140             | 14.21987(16) | 16.7376(2)   | 7.19397(8) | 1712.21(3)         |
| 150             | 14.22557(16) | 16.7401(2)   | 7.19826(8) | 1714.18(3)         |
| 160             | 14.22928(16) | 16.7414(2)   | 7.20240(8) | 1715.74(3)         |
| 170             | 14.23442(16) | 16.7428(2)   | 7.20560(8) | 1717.27(3)         |
| 180             | 14.23847(15) | 16.74459(19) | 7.20989(8) | 1718.96(3)         |
| 190             | 14.24309(16) | 16.7493(2)   | 7.21389(8) | 1720.96(3)         |
| 200             | 14.24638(16) | 16.7531(2)   | 7.21670(8) | 1722.42(3)         |
| 210             | 14.24903(15) | 16.75843(19) | 7.22030(8) | 1724.14(3)         |
| 220             | 14.25171(15) | 16.76451(19) | 7.22359(8) | 1725.88(3)         |
| 230             | 14.25477(16) | 16.7711(2)   | 7.22697(9) | 1727.74(4)         |
| 240             | 14.2568(2)   | 16.7793(2)   | 7.2308(1)  | 1729.73(4)         |

**Table S4:** Temperature dependence of unit cell parameters (cooling).

| Temperature (K) | <b>a</b> (Å) | <b>b</b> (Å) | <b>c</b> (Å) | <i>V</i> (Å <sup>3</sup> ) |
|-----------------|--------------|--------------|--------------|----------------------------|
| 240             | 14.2551(3)   | 16.7783(4)   | 7.23216(18)  | 1729.76(8)                 |
| 230             | 14.2521(3)   | 16.7712(4)   | 7.22817(18)  | 1727.71(8)                 |
| 220             | 14.2508(4)   | 16.7653(4)   | 7.22435(18)  | 1726.04(8)                 |
| 210             | 14.2512(4)   | 16.7650(4)   | 7.22398(18)  | 90.005(2)                  |
| 200             | 14.2517(4)   | 16.7647(4)   | 7.22358(18)  | 1725.90(8)                 |
| 190             | 14.2448(4)   | 16.7449(5)   | 7.2121(2)    | 1720.30(8)                 |
| 180             | 14.2429(4)   | 16.7414(4)   | 7.20818(19)  | 1718.76(8)                 |
| 170             | 14.2399(4)   | 16.7372(4)   | 7.2040(2)    | 1716.96(8)                 |
| 160             | 14.2380(4)   | 16.7327(4)   | 7.2006(2)    | 1715.47(8)                 |
| 150             | 14.2352(4)   | 16.7291(5)   | 7.1962(2)    | 1713.73(9)                 |
| 140             | 14.2332(4)   | 16.7263(5)   | 7.1923(2)    | 1712.26(9)                 |
| 130             | 14.2312(4)   | 16.7237(5)   | 7.1880(2)    | 1710.73(9)                 |

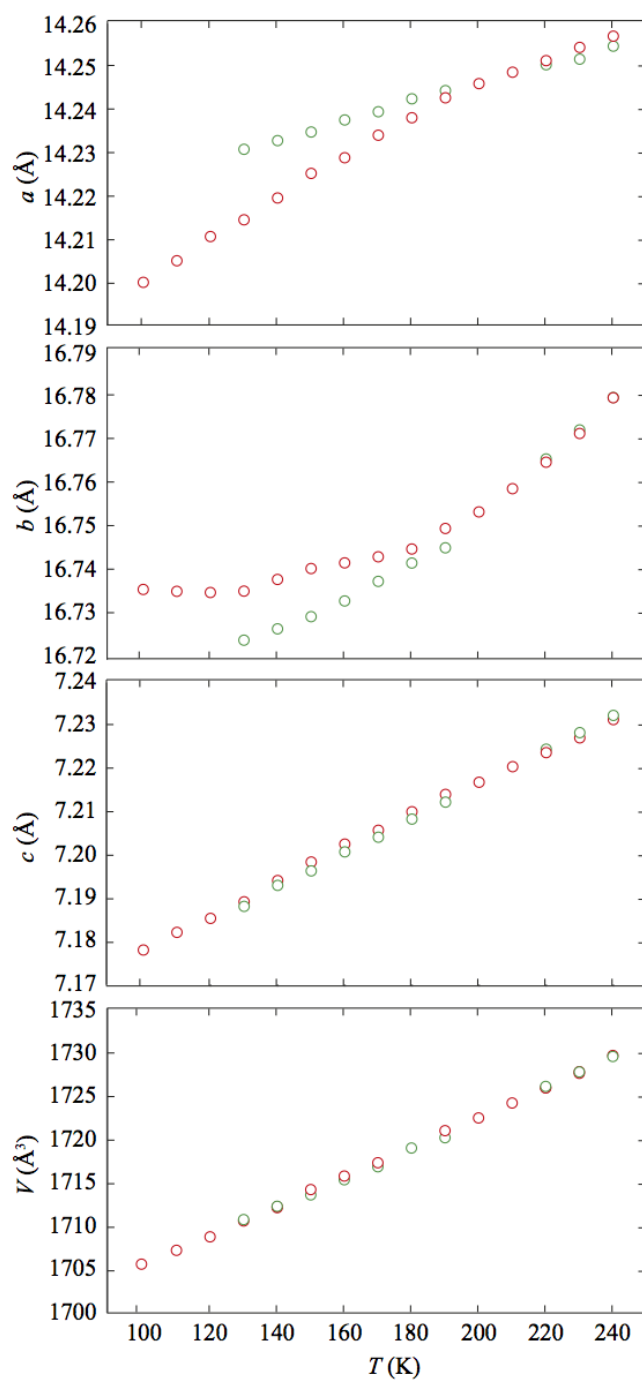

**Figure S2:** Thermal dependence of the lattice parameters, indicating the lack of hysteresis on cooling. Red circles represent the heating and green circles the cooling data. The deviation at low temperatures observed for the  $a$  and  $b$  axes is likely attributable to partial dehydration of the framework after sustained exposure to dry  $N_2$  gas.

## 2.2 Treatment of water molecules

Particular care was given to hydrogen atom placement owing to the disordered nature of the water channel sub-structure, described in the manuscript. For the 100 K dataset, following initial anisotropic refinement of non-hydrogen atoms, all hydrogen atoms were located using a difference Fourier map. Hydrogen atom positions and isotropic thermal parameters were refined with soft restraints prior to their inclusion in the final refinement using a riding model (as described in Ref. 4).

Scattering by hydrogen atoms makes a larger relative contribution to low angle reflection intensities owing to a greater fall-off in scattered intensity than that of non-hydrogen atoms (see Fig. 5 in Ref. 4). Thus, truncating the data to lower resolutions has the effect of enhancing the electron density attributed to hydrogen atoms (1.1 Å has been identified as a suitable cut-off). Figure S3(a) shows a generalised difference Fourier section calculated in the vicinity of the water molecules using the data below 1.1 Å, when the occupancies of the water hydrogens are set to zero. For all four molecules, there are clearly defined regions of density for each of the hydrogens.

A similar procedure was followed for the 240 K data, however the initial coordinates of the water molecules were derived from the ordered, low temperature structure. The *b*-glide symmetry operator, not present at 100 K, collapses the four water molecules onto two positions, resulting in a superposition of the two water channel meso-helices (O400 maps onto O100, and O300 onto O200), thus each water molecule is half occupied. Refinement of the oxygen with anisotropic thermal parameters is unstable due to correlation caused by the close proximity of the two sites. Hydrogen atom positions and isotropic thermal parameters were then refined with soft restraints prior to their inclusion in the final refinement using a riding model as for the structure determined at 100 K. Figure S3(b) shows a generalised difference Fourier section when the hydrogen atom occupancies are set to zero.

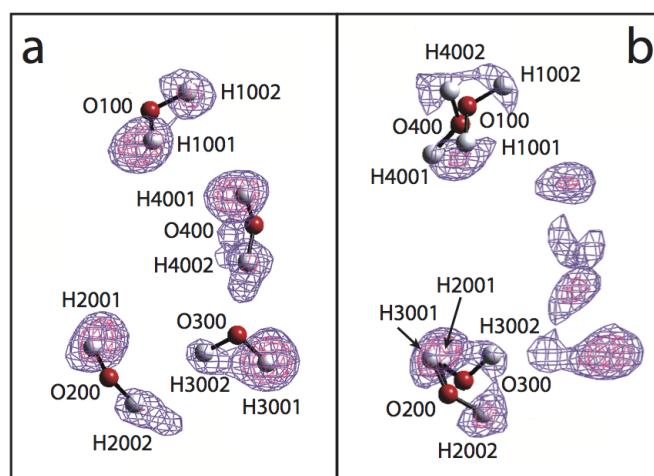

**Figure S3:** Generalised section of the difference Fourier maps for the water molecules with hydrogen occupancies set to 0 and the data truncated at 1.1 Å for (a) 100 K ( $Pna2_1$ ) and (b) 240 K ( $Pbcn$ ). The unoccupied density in (b) becomes symmetry-related to the other regions of density by the  $b$ -glide that is generated by the phase transition. When hydrogen occupancies are set to 1 (in (a)) and 0.5 (in (b)), no density is visible.

### 3 The order parameter

#### 3.1 Relationship to diffraction intensities

The relevant order parameter for this order/disorder transition can be related directly from the structure factor expression. We consider the system to consist of fractions  $\chi$  and  $(1 - \chi)$  of the low-temperature  $P2_1cn$  structure and its inverse (obtained by action of a  $b$ -glide perpendicular to  $a$ ); the corresponding order parameter is consequently

$$\xi = 2\chi - 1. \quad (1)$$

Using this construction, the structure factor associated with  $(0kl)$  reflections is

$$F(0kl) = \chi \sum_{j=1}^N f_j \exp[2\pi i(ky_j + lz_j)] + (1 - \chi) \sum_{j=1}^N f_j \exp\{2\pi i[k(y_j + \frac{1}{2}) + lz_j]\}, \quad (2)$$

$$= \sum_{j=1}^N f_j \exp[2\pi i(ky_j + lz_j)] [\chi + (1 - \chi) \exp(\pi i k)]. \quad (3)$$

For those  $(0kl)$  reflections forbidden in  $Pbcn$  (*i.e.*,  $k$  odd), we have

$$F(0kl) = (2\chi - 1)F_{P2_1cn}(0kl), \quad (4)$$

where  $F_{P2_1cn}(0kl)$  is the relevant structure factor for the ordered  $P2_1cn$  phase. Consequently  $I(0kl) = |F(0kl)|^2$  is proportional to  $\xi^2$  and  $\xi$  to  $\sqrt{I(0kl)}$ .

#### 3.2 Experimental determination of the order parameter variation with temperature

Measured intensities for three representative systematic absence violations and the reference  $(042)$  reflection are given in Table S5. The corresponding values of the order parameter  $x_i$  and their uncertainties are given in Table S6; these results are plotted in Fig. S4. Synthesised precession images assembled from the raw diffraction data are shown in Fig. S5 in order to illustrate the disappearance and emergence of satellite reflections on heating and cooling.

**Table S5:** Selected reflection intensities, averaged over all symmetry equivalent reflections, for HHTP·4H<sub>2</sub>O.

| <i>T</i> (K) | <i>I</i> (042) | $\sigma_I$ (042) | <i>I</i> (071) | $\sigma_I$ (071) | <i>I</i> (031) | $\sigma_I$ (031) | <i>I</i> (011) | $\sigma_I$ (011) |
|--------------|----------------|------------------|----------------|------------------|----------------|------------------|----------------|------------------|
| 100          | 28488          | 141              | 5345           | 81               | 763            | 21               | 1708           | 43               |
| 110          | 27580          | 139              | 5117           | 83               | 773            | 20               | 1687           | 41               |
| 120          | 28133          | 143              | 5195           | 83               | 789            | 20               | 1710           | 42               |
| 130          | 28433          | 148              | 5028           | 86               | 792            | 22               | 1652           | 43               |
| 140          | 28329          | 150              | 4922           | 78               | 780            | 22               | 1652           | 42               |
| 150          | 27562          | 147              | 4749           | 76               | 773            | 20               | 1562           | 41               |
| 160          | 28343          | 152              | 4759           | 78               | 796            | 21               | 1600           | 42               |
| 170          | 27993          | 149              | 4325           | 73               | 752            | 21               | 1514           | 40               |
| 180          | 28188          | 152              | 4063           | 73               | 693            | 21               | 1464           | 40               |
| 190          | 29205          | 160              | 3908           | 74               | 680            | 21               | 1419           | 41               |
| 200          | 29269          | 163              | 3464           | 71               | 597            | 22               | 1325           | 41               |
| 210          | 29772          | 166              | 2920           | 73               | 476            | 19               | 1080           | 39               |
| 220          | 31408          | 176              | 1994           | 64               | 365            | 19               | 790            | 36               |
| 230          | 31287          | 185              | 929            | 50               | 174            | 17               | 326            | 27               |
| 240          | 30318          | 175              | 152            | 29               | 39             | 14               | 74             | 19               |



**Table S6:** Order parameters for selected reflections for HHTP·4H<sub>2</sub>O.

| Temperature (K) | $\xi(071)$ | $\sigma_{\xi}(071)$ | $\xi(031)$ | $\sigma_{\xi}(031)$ | $\xi(011)$ | $\sigma_{\xi}(011)$ |
|-----------------|------------|---------------------|------------|---------------------|------------|---------------------|
| 100             | 0.4332     | 0.0034              | 0.1637     | 0.0023              | 0.2448     | 0.0031              |
| 110             | 0.4307     | 0.0037              | 0.1674     | 0.0022              | 0.2473     | 0.0031              |
| 120             | 0.4297     | 0.0036              | 0.1675     | 0.0022              | 0.2465     | 0.0031              |
| 130             | 0.4205     | 0.0038              | 0.1669     | 0.0023              | 0.2410     | 0.0032              |
| 140             | 0.4168     | 0.0035              | 0.1659     | 0.0024              | 0.2415     | 0.0032              |
| 150             | 0.4151     | 0.0035              | 0.1674     | 0.0023              | 0.2380     | 0.0032              |
| 160             | 0.4098     | 0.0035              | 0.1676     | 0.0023              | 0.2376     | 0.0032              |
| 170             | 0.3931     | 0.0035              | 0.1639     | 0.0023              | 0.2325     | 0.0031              |
| 180             | 0.3797     | 0.0035              | 0.1568     | 0.0024              | 0.2279     | 0.0032              |
| 190             | 0.3658     | 0.0036              | 0.1526     | 0.0024              | 0.2204     | 0.0032              |
| 200             | 0.3440     | 0.0037              | 0.1428     | 0.0026              | 0.2128     | 0.0034              |
| 210             | 0.3132     | 0.0040              | 0.1264     | 0.0026              | 0.1904     | 0.0035              |
| 220             | 0.2520     | 0.0041              | 0.1078     | 0.0029              | 0.1586     | 0.0037              |
| 230             | 0.1723     | 0.0047              | 0.0745     | 0.0036              | 0.1021     | 0.0042              |
| 240             | 0.0707     | 0.0067              | 0.0361     | 0.0063              | 0.0495     | 0.0063              |

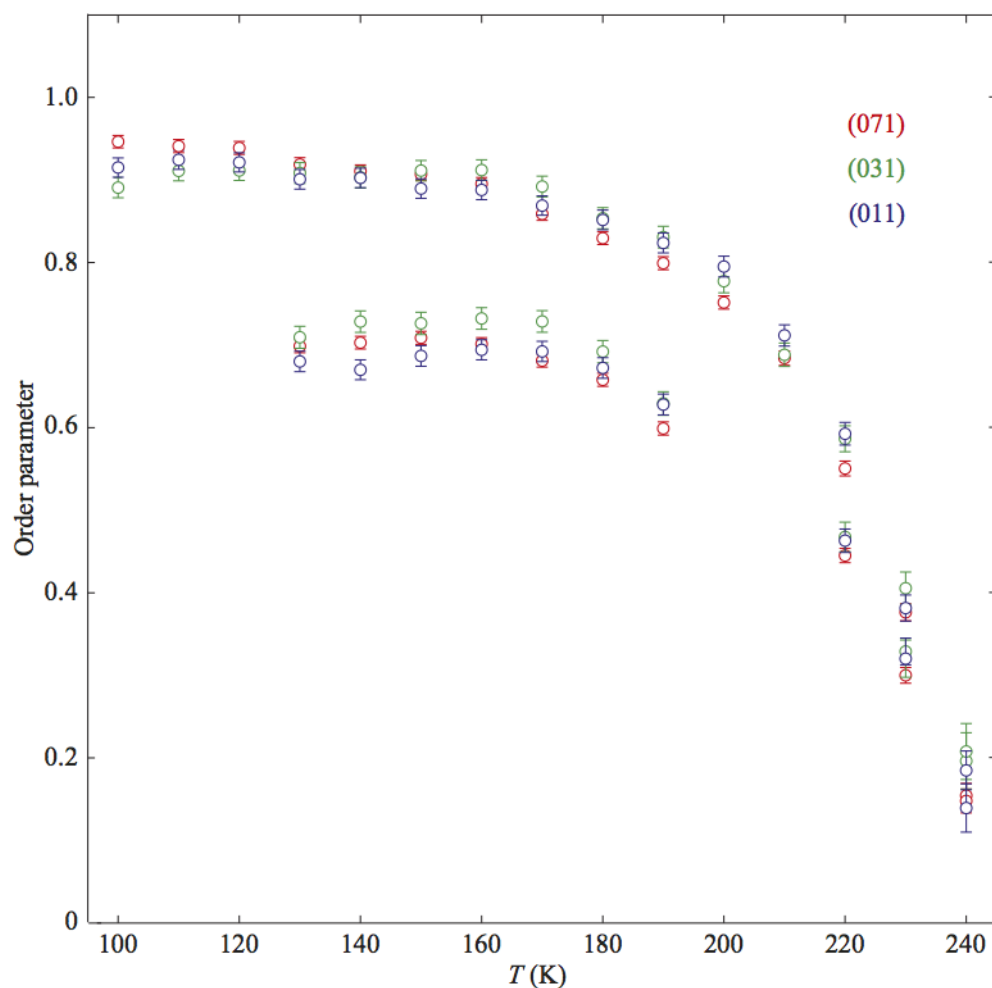

**Figure S4:** Thermal dependence of the order parameter plot, indicating the lack of hysteresis on cooling. The discrepancy between the values of the order parameter at low temperature between heating and cooling runs is discussed in the main text.

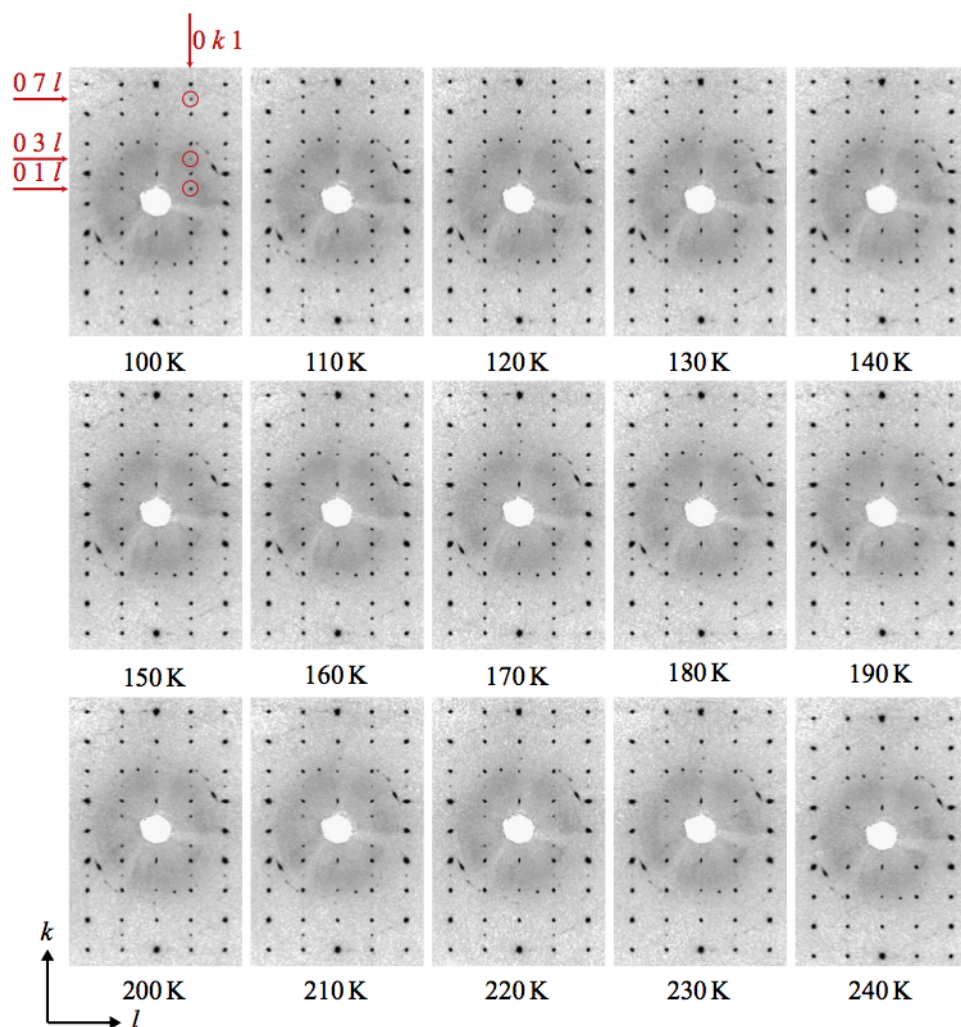

**Figure S5:** Synthesised precession images of the  $(0kl)$  plane, showing the decay of systematic absence violations for  $Pbcn$ . The systematic absences visible for the  $(07l)$ ,  $(03l)$  and  $(01l)$  reflections are denoted with red circles on the 100 K image. Their intensities decrease with temperature and are completely absent by 240 K.

## 4 References

- (S1) J. Cosier, A. Glazer, *J. Appl. Cryst.* **19**, 105 (1986).
- (S2) A. Altomare, *et al.*, *J. Appl. Cryst.* **27**, 435 (1994).
- (S3) P. W. Betteridge, J. R. Carruthers, R. I. Cooper, K. Prout, D. J. Watkin, *J. Appl. Cryst.* **36**, 1487 (2003).
- (S4) R. I. Cooper, A. L. Thompson, D. J. Watkin, *J. Appl. Cryst.* **43**, 1100 (2010).
